# Supplementary material
Source: PubMed Central journal article supplement (PMC2824391)
Supplement: 0910292107_pnas.200910292SI.pdf [file 0910292107_pnas.200910292SI.pdf]

# Supporting Information

Masubuchi et al. 10.1073/pnas.0910292107

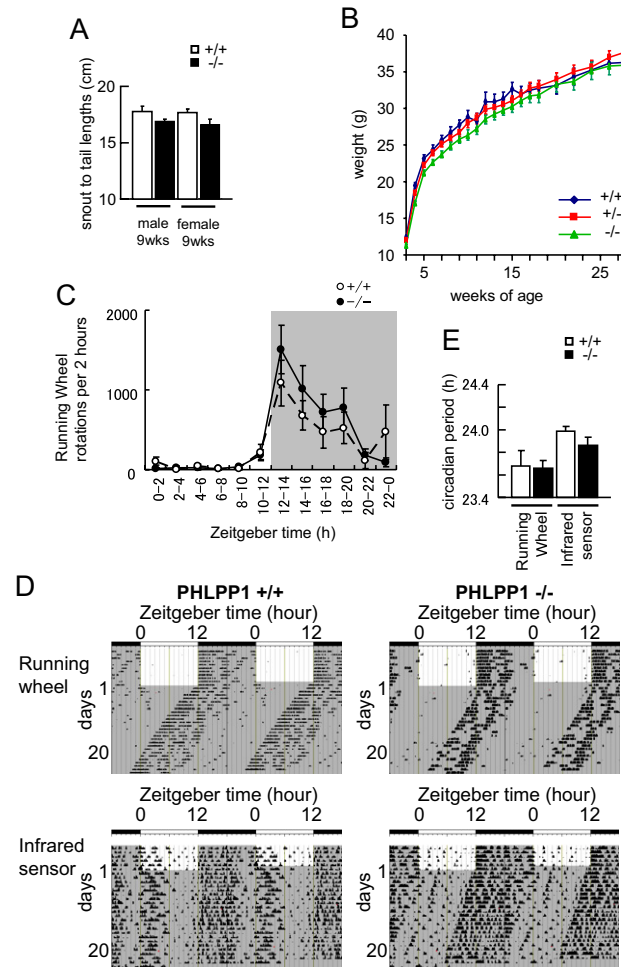

**Fig. S1.** Growth, daily activity, and circadian activity periods of  $PHLPP1^{+/+}$  and  $PHLPP1^{-/-}$  mice. (A) Snout-to-tail lengths of 9-week-old animals are indicated by open bars [ $PHLPP1^{+/+}$  (male,  $n = 5$ ; female,  $n = 3$ )] and filled bars [ $PHLPP1^{-/-}$  (male,  $n = 8$ ; female,  $n = 5$ )] (mean  $\pm$  SEM). (B) Body weights at each week of age are indicated by blue circles ( $PHLPP1^{+/+}$ ;  $n = 22$ –41), red squares ( $PHLPP1^{+/-}$ ;  $n = 63$ –97), and green triangles ( $PHLPP1^{-/-}$ ;  $n = 26$ –52). (C) Running wheel rotation counts under light–dark cycle periods are indicated by open circles [ $PHLPP1^{+/+}$  ( $n = 5$ )] and filled circles [ $PHLPP1^{-/-}$  ( $n = 6$ )] (mean  $\pm$  SEM). After more than 2 weeks of LD entrainment, rotations during the following 3 days are averaged for each time point from separate animals. (D) Double-plotted running wheel and infrared sensor records of  $PHLPP1^{+/+}$  and  $PHLPP1^{-/-}$  mice. Mice were entrained in 12:12 light–dark (LD) cycles and placed in constant darkness (DD). Locomotor activities are expressed in the histogram. Periods of darkness are depicted by gray backgrounds. (E) Circadian periods derived from running wheel and infrared sensor activity (days 2–21) are indicated by open bars [ $PHLPP1^{+/+}$ ] [running wheel ( $n = 5$ ), infrared sensor ( $n = 6$ )] and filled bars [ $PHLPP1^{-/-}$ ] [running wheel ( $n = 6$ ), infrared sensor ( $n = 6$ )] (mean  $\pm$  SEM).
